# Supplementary material
Source: publisher site journal article supplement (https://www.dovepress.com/article/213966)
Supplement: Supplementary file 1 [file get_supplementary_file.php]

## Appendix 1: Interview Guide

### Interview Questions for Rheumatologists

#### Introductory Question

This study examines the role of Arthritis Society ACPAC-trained therapists in reducing wait times for people with inflammatory arthritis waiting to see a rheumatologist. As a rheumatologist, what interested you in this study?

#### Perceived Impact

- How did the intervention impact patients?
  - i.e., physically, emotionally, logistically, positively/negatively
- How did the triage assessment contribute to patient care, and with what outcomes?
  - i.e., quality of care, wait times, information/support, urgent/non urgent cases

#### Experience / Logistics

- How did you accommodate the intervention in your practice?
- How did the intervention impact you and your practice?
  - I.e., physical/logistical, patient flow, personal work load /work load of team, interpersonal dynamics, facilitators/barriers/challenges to implementation

#### Opportunities for improvement

- Would you be interested in continuing to utilize this service in this capacity? Please explain.
- How could the intervention be improved?
  - i.e., efficiency/effectiveness, training/resources, organizational/logistical, etc.
- What was learned from this experience?

#### Perspective on wait times

- How do you feel about this approach for reducing wait times?
  - Wait time from GP to Rheumatologist
  - Wait time from Rheumatologist to diagnosis
  - Wait time from diagnosis to treatment/treatment decision
- Could other approaches be used to better address the issue of rheumatology wait times?

- Do you have any final thoughts or experiences to share?

## **Interview Questions for ACPAC Extended Role Practitioners (ERPs)**

### **Introductory Question**

This study examines the role of Arthritis Society ACPAC-trained therapists in reducing wait times for people with inflammatory arthritis waiting to see a rheumatologist. As an ACPAC-trained therapist, what interested you in this study?

### **Perceived Impact**

- How did the intervention impact patients?
  - i.e., physically, emotionally, logistically, positively/negatively
- How did the triage assessment contribute to patient care, and with what outcomes?
  - i.e., quality of care, wait times, information/support, urgent/non-urgent cases

### **Experience / Logistics**

- How did the rheumatology clinic accommodate this intervention in their practice?
- How did the intervention impact the rheumatology practice?
  - i.e., physical/logistical, patient flow, rheumatologist work load /work load of team, interpersonal dynamics, facilitators/barriers/challenges to implementation

### **Opportunities for improvement**

- Would you be interested in continuing to provide this service in this capacity? Please explain.
- How could the intervention be improved?
  - i.e., efficiency/effectiveness, training/resources, organizational/logistical, etc.
- What was learned from this experience?

### **Perspective on wait times**

- How do you feel about this approach for reducing wait times?
  - Wait time from GP to Rheumatologist
  - Wait time from Rheumatologist to diagnosis

➤ Wait time from diagnosis to treatment/treatment decision

- Could other approaches be used to better address the issue of rheumatology wait times?
- Do you have any final thoughts or experiences to share?

## **Interview Questions for Patients**

### **Introductory Question**

This study examines the role of specially-trained therapists from the Arthritis Society in reducing wait times for people with inflammatory arthritis waiting to see a rheumatologist. As a participant in this study, you had an appointment with a therapist in your rheumatology clinic before you saw your rheumatologist. When you heard about this study, what interested you in participating?

### **Organization of Care**

- Was seeing a therapist before your visit with the rheumatologist a good way to structure your appointment? Was the appointment organized in a logical way?

### **Assessment**

- How do you feel about the assessment you received by the therapist in your rheumatology clinic?
- What did the therapist do in your assessment? How was the appointment structured?
  - i.e., joint exam, medical history, information/resources/support, etc.
- Were any tests ordered for you to complete before your appointment with your rheumatologist?

### **Therapist**

- How did you feel about the assessment skills of your therapist?
- How did you feel about the knowledge of your therapist?
- How helpful was the therapist with understanding and addressing your concerns?

### **Quality of Care**

- Do you feel you received appropriate clinical care?
- Do you feel you were provided with enough information/resources?
- How did your appointment impact your wait time to see a rheumatologist?
- What were the main differences between your appointment with the therapist and your appointment with your rheumatologist?

### **Impact**

- How did your appointment with the therapist impact your knowledge of your condition?
  - i.e., what was learned?
- What impact, if any, did your appointment with the therapist have on your management of your condition and symptoms?

- How did you feel after your appointment with the therapist?

**Satisfaction**

- What did you like about the appointment?
- What did you not like about the appointment?
- Overall, were you satisfied with the experience? Why/why not?

**Opportunities for Improvement**

- How could your experience have been improved?
- Do you have any final thoughts or experiences to share?
